# Supplementary material
Source: PubMed Central journal article supplement (PMC8134510)
Supplement: 41386_2020_860_MOESM1_ESM.pdf [file 41386_2020_860_MOESM1_ESM.pdf]

Supplementary Information for

Association between Neuromelanin-Sensitive MRI Signal and Psychomotor Slowing in Late-Life Depression

Kenneth Wengler, PhD, Brandon K. Ashinoff, PhD, Elena Pueraro, BS, Clifford M. Cassidy, PhD, Guillermo Horga, MD, PhD\*, and Bret R. Rutherford, MD\*

\*These authors contributed equally

**Corresponding Authors**

Bret R. Rutherford, MD

[brr8@cumc.columbia.edu](mailto:brr8@cumc.columbia.edu)

Guillermo Horga, MD, PhD

[Guillermo.Horga@nyspi.columbia.edu](mailto:Guillermo.Horga@nyspi.columbia.edu)

This PDF file includes:

Supplementary Figure 1

**Supplementary Figure 1:**

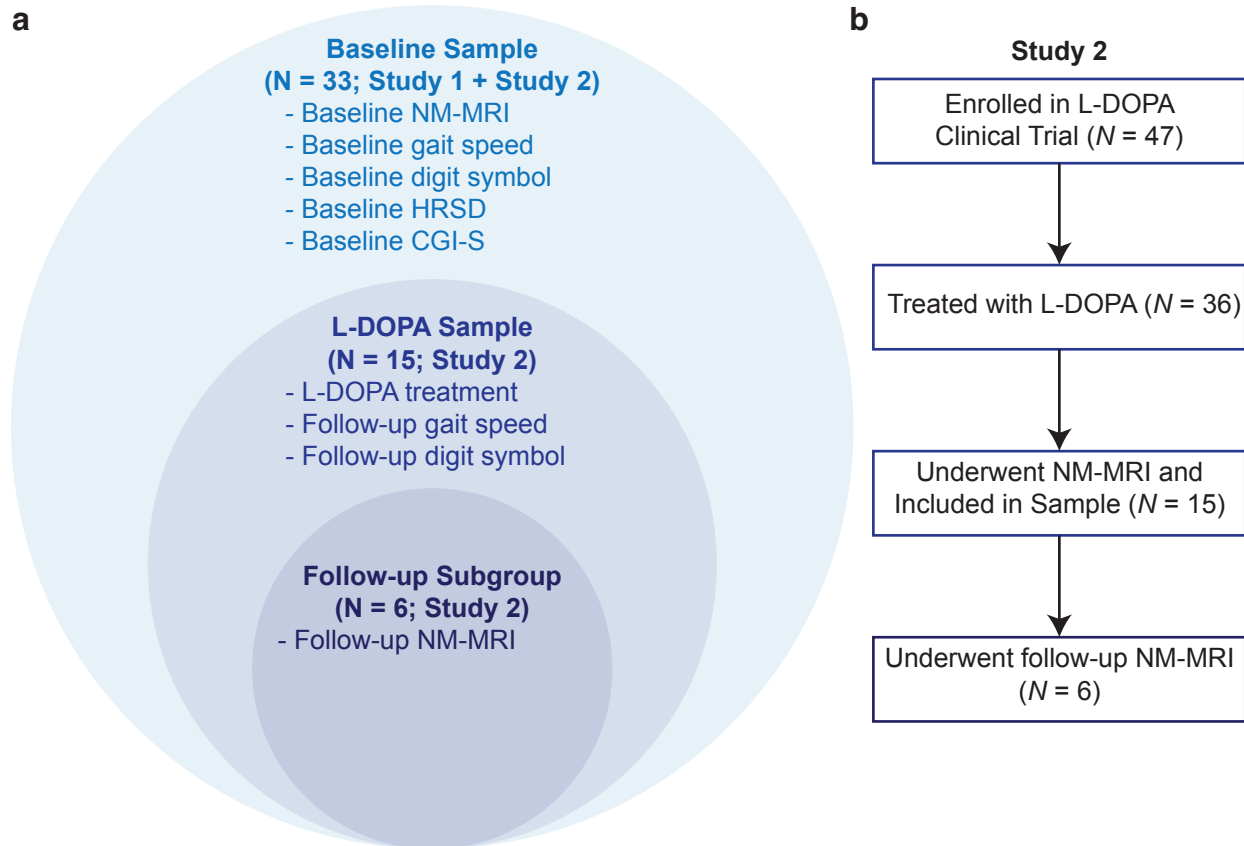

**Figure S1. Description of study samples. (a)** Venn diagram showing the different samples analyzed in the current study. **(b)** Flowchart showing the details of subjects from Study 2. We refer the reader to Rutherford et al., *Biological psychiatry*. 2019;86(3):221-9 for full CONSORT flow diagram.
